# Supplementary material for: Study Profile of the Tohoku Medical Megabank Community-Based Cohort Study
Source: PubMed Central journal article supplement (PMC7738642; doi:10.2188/jea.je20190271), 2021-01-05
Supplement: je-31-065-s001.pdf [file je-31-065-s001.pdf]

**eTable 1.** Age-sex distribution of participants who participated in the TMM CommCohort study from 2013–2015 (fiscal years)(n=86,913)

| Age at baseline survey, years                                                    |             | 20–29 | 30–39 | 40–49 | 50–59  | 60–69  | ≥70    | Total  | Mean age (SD) |             |             |
|----------------------------------------------------------------------------------|-------------|-------|-------|-------|--------|--------|--------|--------|---------------|-------------|-------------|
| Specific health check-up sites based survey                                      |             |       |       |       |        |        |        |        |               |             |             |
| ToMMo                                                                            | Men         | 229   | 751   | 1,167 | 1,940  | 7,593  | 3,735  | 15,415 | 39,797        | 61.8 (10.8) | 59.7 (11.6) |
|                                                                                  | Women       | 427   | 2,196 | 2,629 | 4,564  | 10,804 | 3,762  | 24,382 |               | 58.4 (11.8) |             |
| IMM                                                                              | Men         | 75    | 322   | 820   | 1,343  | 4,602  | 2,821  | 9,983  | 26,674        | 62.8 (10.0) | 61.8 (10.4) |
|                                                                                  | Women       | 139   | 816   | 1,504 | 2,867  | 7,507  | 3,858  | 16,691 |               | 61.2 (10.5) |             |
| Municipality setting based survey                                                |             |       |       |       |        |        |        |        |               |             |             |
| ToMMo                                                                            | Men         | 20    | 66    | 47    | 34     | 84     | 32     | 283    | 660           | 51.2 (15.2) | 50.5 (14.4) |
|                                                                                  | Women       | 29    | 70    | 79    | 84     | 92     | 23     | 377    |               | 50.0 (13.8) |             |
| IMM                                                                              | Men         | -     | -     | -     | -      | -      | -      | -      | -             | -           | -           |
|                                                                                  | Women       | -     | -     | -     | -      | -      | -      | -      |               | -           |             |
| Community Support Center (ToMMo, Miyagi) or Satellite (IMM, Iwate) based surveys |             |       |       |       |        |        |        |        |               |             |             |
| ToMMo                                                                            | Men         | 134   | 349   | 431   | 578    | 1,534  | 1,101  | 4,127  | 13,794        | 60.2 (14.0) | 57.4 (13.8) |
|                                                                                  | Women       | 371   | 994   | 1,470 | 2,143  | 3,207  | 1,482  | 9,667  |               | 56.2 (13.6) |             |
| IMM                                                                              | Men         | 88    | 194   | 298   | 449    | 631    | 376    | 2,036  | 5,988         | 57.0 (14.4) | 54.7 (13.9) |
|                                                                                  | Women       | 180   | 475   | 785   | 1,125  | 945    | 442    | 3,952  |               | 53.6 (13.4) |             |
| All recruitment methods                                                          |             |       |       |       |        |        |        |        |               |             |             |
| ToMMo                                                                            | Men         | 383   | 1,166 | 1,645 | 2,552  | 9,211  | 4,868  | 19,825 | 54,251        | 61.3 (11.7) | 59.0 (12.3) |
|                                                                                  | Women       | 827   | 3,260 | 4,178 | 6,791  | 14,103 | 5,267  | 34,426 |               | 57.7 (12.4) |             |
| IMM                                                                              | Men         | 163   | 516   | 1,118 | 1,792  | 5,233  | 3,197  | 12,019 | 32,662        | 61.8 (11.1) | 60.5 (11.4) |
|                                                                                  | Women       | 319   | 1,291 | 2,289 | 3,992  | 8,452  | 4,300  | 20,643 |               | 59.7 (11.6) |             |
| Total                                                                            | Men         | 546   | 1,682 | 2,763 | 4,344  | 14,444 | 8,065  | 31,844 | 86,913        | 61.5 (11.5) | 59.6 (12.0) |
|                                                                                  | Women       | 1,146 | 4,551 | 6,467 | 10,783 | 22,555 | 9,567  | 55,069 |               | 58.5 (12.1) |             |
|                                                                                  | Men + Women | 1,692 | 6,233 | 9,230 | 15,127 | 36,999 | 17,632 | 86,913 |               | -           |             |

The number of participants excluded those who withdrew consent (disposal of any samples and information) until 31st March 2018 (ToMMo: n = 54,251, IMM: n=32,662, Total: n=86,913).

ToMMo, Miyagi Prefecture; IMM, Iwate Prefecture; SD, standard deviation.

**eTable 2.** Age-adjusted prevalence for current smoking in the TMM CommCohort study from 2013–2015 (fiscal years)(n=82,427)

| Age classes         | Standard population | Specific health check-up sites based survey |        |       |        | Municipality setting based survey |        |       |        | Community Support Center (ToMMo) or Satellite (IMM) based surveys |        |       |        |
|---------------------|---------------------|---------------------------------------------|--------|-------|--------|-----------------------------------|--------|-------|--------|-------------------------------------------------------------------|--------|-------|--------|
|                     |                     | ToMMo                                       |        | IMM   |        | ToMMo                             |        | IMM   |        | ToMMo                                                             |        | IMM   |        |
|                     |                     | Coast                                       | Inland | Coast | Inland | Coast                             | Inland | Coast | Inland | Coast                                                             | Inland | Coast | Inland |
| <b>Men</b>          |                     |                                             |        |       |        |                                   |        |       |        |                                                                   |        |       |        |
| 20–29               | 1,692               | 26.0%                                       | 35.6%  | 25.4% | 36.4%  | 20.0%                             | 13.3%  | -     | -      | 40.0%                                                             | 36.5%  | 41.9% | 34.6%  |
| 30–39               | 6,233               | 51.0%                                       | 44.7%  | 46.4% | 32.9%  | 31.6%                             | 34.8%  | -     | -      | 44.4%                                                             | 38.4%  | 42.5% | 31.3%  |
| 40–49               | 9,230               | 45.6%                                       | 44.2%  | 42.1% | 44.4%  | 10.5%                             | 21.4%  | -     | -      | 41.2%                                                             | 26.0%  | 42.9% | 29.4%  |
| 50–59               | 15,127              | 36.3%                                       | 40.5%  | 41.2% | 43.6%  | 50.0%                             | 25.9%  | -     | -      | 30.8%                                                             | 27.1%  | 33.9% | 32.8%  |
| 60–69               | 36,999              | 24.5%                                       | 24.8%  | 26.4% | 27.3%  | 20.0%                             | 14.1%  | -     | -      | 19.2%                                                             | 16.1%  | 20.0% | 21.5%  |
| ≥70                 | 17,632              | 15.7%                                       | 14.6%  | 15.4% | 13.8%  | 18.2%                             | 0.0%   | -     | -      | 9.9%                                                              | 6.3%   | 7.1%  | 3.4%   |
| Age-adjusted rates* |                     | 28.9%                                       | 29.2%  | 29.8% | 29.8%  | 24.7%                             | 15.5%  | -     | -      | 23.9%                                                             | 19.0%  | 24.3% | 21.6%  |
| <b>Women</b>        |                     |                                             |        |       |        |                                   |        |       |        |                                                                   |        |       |        |
| 20–29               | 1,692               | 15.2%                                       | 15.2%  | 17.1% | 16.7%  | 0.0%                              | 8.0%   | -     | -      | 13.4%                                                             | 15.9%  | 17.7% | 9.1%   |
| 30–39               | 6,233               | 15.3%                                       | 15.5%  | 16.4% | 13.3%  | 17.9%                             | 11.9%  | -     | -      | 14.8%                                                             | 13.1%  | 15.5% | 11.9%  |
| 40–49               | 9,230               | 15.8%                                       | 14.8%  | 16.2% | 11.0%  | 15.0%                             | 11.9%  | -     | -      | 14.8%                                                             | 12.2%  | 18.1% | 15.6%  |
| 50–59               | 15,127              | 10.8%                                       | 9.5%   | 8.3%  | 7.2%   | 9.5%                              | 11.1%  | -     | -      | 9.0%                                                              | 6.4%   | 9.7%  | 6.7%   |
| 60–69               | 36,999              | 3.6%                                        | 3.7%   | 3.3%  | 2.8%   | 4.3%                              | 0.0%   | -     | -      | 4.2%                                                              | 3.9%   | 5.3%  | 4.0%   |
| ≥70                 | 17,632              | 2.4%                                        | 1.8%   | 1.6%  | 0.7%   | 0.0%                              | 0.0%   | -     | -      | 1.8%                                                              | 1.8%   | 2.6%  | 1.2%   |
| Age-adjusted rates* |                     | 7.0%                                        | 6.6%   | 6.4%  | 5.0%   | 6.4%                              | 4.2%   | -     | -      | 6.6%                                                              | 5.7%   | 7.9%  | 5.8%   |

\*The age-adjusted rates for current smoking were calculated using the direct method of standardization, i.e.,  $\sum (r_i * n_i) / N$ .

Here,  $r_i$  is the  $i$ -th age-group specific rate for current smoking,  $n_i$  is the observations of the  $i$ -th age group in the standard population, and  $N$  is the total number of observations in the standard population ( $N = \sum n_i$ ).

The age-adjusted rates were calculated for each of subgroups, defined by sex and type of recruitment, and the entire TMM CommCohort population itself was used as the standard population.

Analytic subjects (ToMMo:  $n = 51,079$ , IMM:  $n = 31,348$ ) were included to classify 3 categories of smoking (current smoking, past smoking, or never smoking) from response to the smoking questions.

ToMMo, Miyagi Prefecture; IMM, Iwate Prefecture.

**eTable 3.** Age-adjusted rates for higher degrees of psychological distress (K6 score $\geq$ 13) in the TMM CommCohort Study from 2013–2015 (fiscal years)(n=81,562)

| Age classes         | Standard population | Specific health check-up sites based survey |        |       |        | Municipality setting based survey |        |       |        | Community Support Center (ToMMo) or Satellite (IMM) based surveys |        |       |        |
|---------------------|---------------------|---------------------------------------------|--------|-------|--------|-----------------------------------|--------|-------|--------|-------------------------------------------------------------------|--------|-------|--------|
|                     |                     | ToMMo                                       |        | IMM   |        | ToMMo                             |        | IMM   |        | ToMMo                                                             |        | IMM   |        |
|                     |                     | Coast                                       | Inland | Coast | Inland | Coast                             | Inland | Coast | Inland | Coast                                                             | Inland | Coast | Inland |
| <b>Men</b>          |                     |                                             |        |       |        |                                   |        |       |        |                                                                   |        |       |        |
| 20–29               | 1,692               | 15.7%                                       | 14.6%  | 6.9%  | 9.1%   | 20.0%                             | 13.3%  | -     | -      | 13.8%                                                             | 24.3%  | 14.5% | 12.0%  |
| 30–39               | 6,233               | 17.6%                                       | 12.6%  | 10.4% | 14.7%  | 15.8%                             | 2.2%   | -     | -      | 9.0%                                                              | 13.9%  | 12.7% | 7.5%   |
| 40–49               | 9,230               | 11.7%                                       | 11.3%  | 9.6%  | 7.0%   | 10.5%                             | 10.7%  | -     | -      | 5.7%                                                              | 9.4%   | 7.1%  | 4.9%   |
| 50–59               | 15,127              | 7.4%                                        | 4.7%   | 6.6%  | 4.2%   | 0.0%                              | 7.4%   | -     | -      | 8.0%                                                              | 6.0%   | 5.9%  | 2.6%   |
| 60–69               | 36,999              | 2.1%                                        | 2.3%   | 3.1%  | 2.3%   | 5.0%                              | 4.7%   | -     | -      | 2.9%                                                              | 1.4%   | 2.3%  | 1.8%   |
| $\geq$ 70           | 17,632              | 2.9%                                        | 1.9%   | 2.6%  | 3.0%   | 9.1%                              | 0.0%   | -     | -      | 2.3%                                                              | 1.6%   | 2.1%  | 3.5%   |
| Age-adjusted rates* |                     | 5.6%                                        | 4.6%   | 4.9%  | 4.3%   | 6.6%                              | 4.8%   | -     | -      | 4.6%                                                              | 4.4%   | 4.4%  | 3.2%   |
| <b>Women</b>        |                     |                                             |        |       |        |                                   |        |       |        |                                                                   |        |       |        |
| 20–29               | 1,692               | 17.7%                                       | 18.3%  | 20.2% | 16.7%  | 33.3%                             | 32.0%  | -     | -      | 17.3%                                                             | 19.8%  | 21.2% | 18.2%  |
| 30–39               | 6,233               | 11.7%                                       | 11.0%  | 14.0% | 15.6%  | 28.6%                             | 7.1%   | -     | -      | 15.6%                                                             | 12.1%  | 13.4% | 10.1%  |
| 40–49               | 9,230               | 11.0%                                       | 11.8%  | 11.4% | 15.1%  | 0.0%                              | 5.1%   | -     | -      | 11.1%                                                             | 9.4%   | 10.5% | 7.4%   |
| 50–59               | 15,127              | 9.9%                                        | 8.9%   | 8.9%  | 8.3%   | 4.8%                              | 4.8%   | -     | -      | 7.2%                                                              | 7.7%   | 6.8%  | 8.0%   |
| 60–69               | 36,999              | 5.6%                                        | 4.7%   | 5.7%  | 4.0%   | 4.3%                              | 1.5%   | -     | -      | 5.0%                                                              | 3.9%   | 4.8%  | 4.3%   |
| $\geq$ 70           | 17,632              | 4.8%                                        | 3.7%   | 4.8%  | 6.1%   | 0.0%                              | 0.0%   | -     | -      | 4.5%                                                              | 3.5%   | 7.1%  | 4.8%   |
| Age-adjusted rates* |                     | 7.4%                                        | 6.7%   | 7.5%  | 7.4%   | 5.4%                              | 3.1%   | -     | -      | 6.9%                                                              | 6.0%   | 7.2%  | 6.1%   |

\*The age-adjusted rates for higher degrees of psychological distress (K6 score $\geq$ 13) were calculated using the direct method of standardization, i.e.,  $\sum (r_i * n_i) / N$ .

Here,  $r_i$  is the  $i$ -th age-group specific rate for higher degrees of psychological distress,  $n_i$  is the observations of the  $i$ -th age group in the standard population, and  $N$  is the total number of observations in the standard population ( $N = \sum n_i$ ).

The age-adjusted rates were calculated for each of subgroups, defined by sex and type of recruitment, and the entire TMM CommCohort population itself was used as the standard population.

Analytic subjects (ToMMo:  $n = 50,679$ , IMM:  $n = 30,883$ ) were included to classify 2 categories of the presence of psychological distress (K6 score  $< 12$  or  $\geq 13$ ) from response to the K6 questions.

ToMMo, Miyagi Prefecture; IMM, Iwate Prefecture.
